# Supplementary material
Source: publisher figshare collection journal article supplement (https://tandf.figshare.com/ndownloader/files/14172551)
Supplement: Supplementary file 1 [file 14172551]

## SUPPLEMENTRY MATERIAL

### GC-MS Analysis of Metabolites From Soxhlet Extraction, Ultrasound-Assisted Extraction and Supercritical Fluid Extraction of *Salacca zalacca* Flesh And Its Alpha-Glucosidase Inhibitory Activity

Mohammed S. M. Saleh<sup>1</sup>, Dzatil Awanis Mohd Bukhari<sup>1</sup>, Mohammed Jamshed Ahmad Siddiqui<sup>1\*</sup>, Abdul Razak Kasmuri<sup>2</sup>, Suganya Murugesu<sup>1</sup> and Alfi Khatib<sup>1</sup>

<sup>1</sup>*Department of Pharmaceutical Chemistry, Kulliyyah of Pharmacy, International Islamic University Malaysia, Kuantan Campus, 25200 Kuantan, Pahang, Malaysia.*

<sup>2</sup>*Department of Basic Medical Sciences, Kulliyyah of Pharmacy, International Islamic University Malaysia, Kuantan Campus, 25200 Kuantan, Pahang, Malaysia.*

\* E-mail of the corresponding author: [siddiquijamshed@hotmail.com](mailto:siddiquijamshed@hotmail.com)

Different extraction processes were employed to extract bioactive metabolites from *Salacca zalacca* flesh by a range of aqueous and organic solvents. The highest extraction yield was obtained by 50% ethanol extract of SE ( $73.18 \pm 4.35\%$ ), whereas SFE\_1 showed the lowest yield ( $0.42 \pm 0.08\%$ ). All extracts were evaluated for *in vitro*  $\alpha$ -glucosidase inhibitory activity, measured by their  $IC_{50}$  values in comparison to that of quercetin, the positive control ( $IC_{50} = 2.7 \pm 0.7 \mu\text{g/mL}$ ). The lowest  $\alpha$ -glucosidase inhibitory activity was indicated by water extract of SE ( $IC_{50} = 724.3 \pm 42.9 \mu\text{g/mL}$ ) and the highest activity was demonstrated by 60% ethanol extract by UAE ( $IC_{50} = 16.2 \pm 2.4 \mu\text{g/mL}$ ). All extracts were analysed by GC-MS and identified metabolites like carbohydrates, fatty acids, organic acids, phenolic acids, sterols and alkane-based compounds etcetera that may possess the potential as  $\alpha$ -glucosidase inhibitor and may attribute to the  $\alpha$ -glucosidase inhibitory activity.

Keywords: *Salacca zalacca*;  $\alpha$ -glucosidase; metabolite profiling.

## **EXPERIMENTAL**

### ***Plant material***

Different parts (fruits, stems and leaves) of *Salacca zalacca* were collected from a *S. zalacca* farm at Sungai Udang, Melaka, Malaysia at the age of 5 months post pollination. The samples were kept in the herbarium of Kulliyyah of Pharmacy, International Islamic University Malaysia and was identified by voucher specimen no. PIIUM 0269.

### ***Chemicals***

The ethanol used in extraction was purchased from Merck KGaA (Massachusetts, United States). The  $\alpha$ -glucosidase enzyme was purchased from Megazyme (Wicklow, Ireland), and the substrates 4-nitrophenyl  $\alpha$ -D-glucopyranoside (pNPG) as well as the positive control; quercetin was purchased from Sigma-Aldrich (St. Louis, MO).

As for the sample preparation of GC-MS, the pyridine was supplied by Merck, N-methyl-N-(trimethylsilyl)trifluoroacetamidepurum (97%) (gas chromatography grade) and methoxyamine hydrochloride (98%) were purchased from Sigma-Aldrich (St. Louis, MO).

### ***Sample preparation and extraction***

Prior to extraction, the flesh was peeled, washed, cut into small pieces and stored at -80°C deep freezer. The frozen fruits were freeze dried to remove all moisture and later were ground into fine powder. All samples were stored at -80°C until further analysis.

### ***Soxhlet Extraction (SE)***

10 g of sample was weighed and transferred into a filter paper extraction thimble and loaded onto the main chamber of Soxhlet extractor. Subsequently, the sample was extracted by absolute ethanol, 50% ethanol and water for 6 hours. Rotary vacuum evaporator (Buchi, B-490, Postfach, Flawil, Switzerland) was used to remove the remaining solvent at 40°C and the remaining extracts were kept at -80°C.

### *Ultrasound-Assisted Extraction (UAE)*

5 g of sample was immersed in 100 ml solvent (20% ethanol, 40% ethanol, 60% ethanol, 80% ethanol, 100% ethanol and water) in 250 ml conical flask. The sample material was sonicated at 40°C for 30 minutes. The extracts were filtered using Whatman paper no. 1 and solvent was evaporated using a rotary evaporator at 40°C prior to freeze-drying.

### *Supercritical Fluid Extraction (SFE)*

The extraction by supercritical carbon dioxide was conducted using the Waters TAP SFE Biobotanical System (Milford, USA). 20 g of sample was loaded onto the extraction vessel. The extraction was performed for 90 minutes under following condition; CO<sub>2</sub> flow rate: 20 g/min, temperature: 50°C and 60°C, pressure: 300 bar and co-solvent: 10% ethanol.

All extracts were dried in a freeze dryer (Crist, Beta 1-8 LD Plus, Newtown, Wern, Shropshire, U.K.) to evaporate remaining solvent. All extracts were stored at -80°C for further analysis. The total extraction yields were determined in percentage using the following equation:

$$\text{Extraction yield (\%)} = [(\text{Mass of dry extract}) / (\text{Initial mass of dry sample})] \times 100$$

### ***In vitro* $\alpha$ -Glucosidase Inhibition Study**

The assay was performed in 96-well microtiter plate using the method described by Sabina et al. (2016) with some modifications. A 5 mg extract was weighed and immersed in 1 mL of dimethyl sulfoxide (DMSO) to prepare the stock solution. 100  $\mu$ L of 30 mM phosphate buffer (pH 6.5) was added to stock solution to obtain a final assay concentration of 200  $\mu$ g/mL. 1 mg of quercetin was dissolved in 1 mL of DMSO to make a positive control (Subramanian et al. 2008). The  $\alpha$ -glucosidase enzyme ( $\alpha$ -glucosidase type 1 from *Saccharomyces cerevisiae*; Megazyme 130301) was dissolved in 50 mM potassium phosphate buffer (pH 6.5). The highest concentration of enzyme solution (0.02 U/well) was used and incubated for 5 min at room temperature. 6 mg of substrate (p-nitrophenyl- $\alpha$ -D-glucopyranose; Sigma-Aldrich,

N1377-5G) was weighed and diluted in 20 mL volume of 50 mM phosphate buffer (pH 6.5). Following that, substrate solution was added into wells and allowed to incubate at room temperature for 15 min. The enzymatic reaction was stopped by adding 2M glycine (pH 10), the stopper reagent. Upon addition of glycine, a bright yellow color was observed as the enzyme hydrolyzed the substrate (pNPG) into p-nitrophenol. The rate of reaction was directly proportional to the enzyme activity. According to the procedure, the 30 mM phosphate buffer (100  $\mu$ L), plant extracts (10  $\mu$ L), quercetin (10  $\mu$ L),  $\alpha$ -glucosidase enzyme (15  $\mu$ L), substrate (75  $\mu$ L) and glycine (50  $\mu$ L) were added to a 96-well microtiter plate, to make up a final volume of 250  $\mu$ L. The absorbance (Abs) was analyzed at 405 nm using a spectrophotometer (NanoQuant/Tecan, Infinite M 200) (Deutschländer et al. 2009). The inhibitory activity was calculated according to the following formula (Wang et al. 2010):

$$\% \text{ Inhibition} = [(Abs_{\text{control}} - Abs_{\text{sample}}) / Abs_{\text{control}}] \times 100$$

The highest inhibitory activity was further distinguished by analyzing the concentration required to inhibit 50% of the  $\alpha$ -glucosidase activity ( $IC_{50}$ ), which were established graphically.  $IC_{50}$  values of all extracts were calculated from the dose response curves by regression analysis and were reported as mean  $\pm$  standard deviation of three independent assays and each independent experiment was conducted in triplicate.

### ***Derivatization***

Derivatization procedure was carried out prior to the analysis (Robinson et al. 2005). 25 mg of the sample extract was immersed in 50  $\mu$ L of pyridine in a 2 mL centrifuge tube and was sonicated for 10 min at 30°C. After that, 100  $\mu$ L of methoxyamine HCl (20 mg/mL in pyridine) was added into the sample solution, and then it was vortexed. The mixture was incubated for 2 hr at 60°C with an addition of 300  $\mu$ L of MSTFA [N-Methyl-N-(trimethylsilyl) trifluoroacetamide] later, followed by another incubation at 60°C for 30 min. Lastly, the sample solutions was filtered and injected into the column for the analysis.

### ***Gas chromatography-mass spectrometry (GC-MS) analysis***

GC-MS analysis was performed on derivatized samples of *S. zalacca* flesh extracts, using the Agilent's GC-MS system. A DB-5MS 5% phenyl methyl siloxane column with an inner diameter (ID) of 250  $\mu\text{m}$  and a film thickness of 0.25  $\mu\text{m}$  was used as the GC column for the analysis. The oven temperature was initially set at 160  $^{\circ}\text{C}$  for 5 min, and then increase to a target temperature of 315  $^{\circ}\text{C}$  in 5 min at a rate of 30  $^{\circ}\text{C}/\text{min}$ . Helium was used as the carrier gas at a fixed flow rate of 1 mL/min. The injector and ion source temperatures was adjusted to 330 and 250  $^{\circ}\text{C}$  respectively. Subsequently, mass spectra was acquired by a full scan and a monitoring mode with a mass scan range of 50 to 550  $m/z$  after a 6 min of solvent delay. The spectra for each of the chromatogram peaks was then compared with those in the NIST14 database library and the retention time (RT) index of common primary and secondary metabolites. Both of the chromatogram and mass spectra was processed using Agilent ChemStation, Automated Mass Spectral Deconvolution and Identification System (AMDIS) and Agilent's Deconvoluted Reporting Software (DRS).

### ***Statistical analysis***

All data were expressed as mean  $\pm$  SD. The results of extraction yield and  $\text{IC}_{50}$  of extracts were assessed with Minitab 16 (Minitab Inc., State College, PA) by one-way analysis of variance (ANOVA) with Tukey's comparison test. A 95% confidence interval was used and all data were considered significantly different when  $P < 0.05$ .

### **References**

- Artanti N, Tachibana S, Kardono LBS, Sukiman H. 2012. Isolation of  $\alpha$ -glucosidase Inhibitors Produced by an Endophytic Fungus, *Colletotrichum* sp. TSC13 from *Taxus sumatrana*. *Pakistan J Biol Sci*. 15:673–679.
- Deuschländer MS, van de Venter M, Roux S, Louw J, Lall N. 2009. Hypoglycaemic activity of four plant extracts traditionally used in South Africa for diabetes. *J Ethnopharmacol*. 124:619–624.

- Kumar S, Kumar V, Prakash O. 2013. Enzymes inhibition and antidiabetic effect of isolated constituents from *Dillenia indica*. *Biomed Res Int*. 2013:382063.
- Liu L, Deseo MA, Morris C, Winter KM, Leach DN. 2011. Investigation of  $\alpha$ -glucosidase inhibitory activity of wheat bran and germ. *Food Chem*. 126:553–561.
- Miyazawa M, Yagi N, Taguchi K. 2005. Inhibitory Compounds of Alpha-Glucosidase Activity from *Arctium lappa* L. *J Oleo Sci*. 54:589–594.
- Nguyen TH, Kim SM. 2015.  $\alpha$ -Glucosidase Inhibitory Activities of Fatty Acids Purified from the Internal Organ of Sea Cucumber *Stichopus japonicus*. *J Food Sci*. 80:H841–H847.
- Robinson AR, Gheneim R, Kozak RA, Ellis DD, Mansfield SD. 2005. The potential of metabolite profiling as a selection tool for genotype discrimination in *Populus*. *J Exp Bot*. 56:2807–2819.
- Subramanian R, Asmawi MZ, Sadikun A. 2008. In vitro alpha-glucosidase and alpha-amylase enzyme inhibitory effects of *Andrographis paniculata* extract and andrographolide. *Acta Biochim Pol*. 55:391–8.
- Wang H, Du Y-J, Song H-C. 2010.  $\alpha$ -Glucosidase and  $\alpha$ -amylase inhibitory activities of guava leaves. *Food Chem*. 123:6–13.
- Wansi JD, Lallemand M-C, Chiozem DD, Toze FAA, Mbaze LM, Naharkhan S, Iqbal MC, Tilleguin F, Wandji J, Fomum ZT. 2007.  $\alpha$ -Glucosidase inhibitory constituents from stem bark of *Terminalia superba* (Combretaceae). *Phytochemistry*. 68:2096–2100.
- Ye X-P, Song C-Q, Yuan P, Mao R-G. 2010.  $\alpha$ -Glucosidase and  $\alpha$ -Amylase Inhibitory Activity of Common Constituents from Traditional Chinese Medicine Used for Diabetes Mellitus. *Chin J Nat Med*. 8:349–352.

**TABLE S1: Comparison of extraction yield and  $\alpha$ -glucosidase inhibitory activity of *S. zalacca* extracts under different extraction conditions**

| Extraction condition        | Extraction yield (%)           | $\alpha$ -Glucosidase inhibitory activity, IC <sub>50</sub> ( $\mu$ g/mL) |
|-----------------------------|--------------------------------|---------------------------------------------------------------------------|
| SE_0% Ethanol               | 33.7 $\pm$ 3.9 <sup>b</sup>    | 724.3 $\pm$ 42.9 <sup>e</sup>                                             |
| SE_50% Ethanol              | 73.18 $\pm$ 4.35 <sup>g</sup>  | 110.9 $\pm$ 12.5 <sup>bc</sup>                                            |
| SE_100% Ethanol             | 50.37 $\pm$ 1.81 <sup>de</sup> | 89.8 $\pm$ 6.0 <sup>bc</sup>                                              |
| UAE_0% Ethanol              | 46.27 $\pm$ 3.64 <sup>cd</sup> | 663.1 $\pm$ 48.3 <sup>d</sup>                                             |
| UAE_20% Ethanol             | 57.28 $\pm$ 2.38 <sup>f</sup>  | 103.7 $\pm$ 8.2 <sup>bc</sup>                                             |
| UAE_40% Ethanol             | 52.30 $\pm$ 1.60 <sup>ef</sup> | 83.8 $\pm$ 11.0 <sup>bc</sup>                                             |
| UAE_60% Ethanol             | 49.2 $\pm$ 2.63 <sup>de</sup>  | 16.2 $\pm$ 2.4 <sup>a</sup>                                               |
| UAE_80% Ethanol             | 42.08 $\pm$ 1.62 <sup>c</sup>  | 23.8 $\pm$ 1.6 <sup>a</sup>                                               |
| UAE_100% Ethanol            | 33.41 $\pm$ 2.18 <sup>b</sup>  | 19.9 $\pm$ 2.9 <sup>a</sup>                                               |
| SFE_1 (No co-solvent, 50°C) | 0.42 $\pm$ 0.08 <sup>a</sup>   | 27.9 $\pm$ 14.8 <sup>a</sup>                                              |
| SFE_2 (10% Ethanol, 50°C)   | 0.67 $\pm$ 0.04 <sup>a</sup>   | 26.7 $\pm$ 1.9 <sup>a</sup>                                               |
| SFE_3 (10% Ethanol, 60°C)   | 0.51 $\pm$ 0.04 <sup>a</sup>   | 17.6 $\pm$ 1.5 <sup>a</sup>                                               |
| Quercetin                   | ND                             | 2.7 $\pm$ 0.7 <sup>a</sup>                                                |

Each value in the table is represented as mean  $\pm$  SD (n = 3).

Values in each column with different superscript letters are significantly different (P < 0.05). ND: Not determined.

**TABLE S2: Metabolites identified in SE extracts**

| No        | RT     | Similar<br>ity<br>Index<br>(%) | Molecula<br>r weight | Molecular<br>formula                            | Tentative<br>metabolites   | Relative<br>extracts |
|-----------|--------|--------------------------------|----------------------|-------------------------------------------------|----------------------------|----------------------|
| <b>1</b>  | 20.032 | 90                             | 180.16               | C <sub>6</sub> H <sub>12</sub> O <sub>6</sub>   | D-Psicofuranose            | SE_E50               |
| <b>2</b>  | 20.638 | 87                             | 180.16               | C <sub>6</sub> H <sub>12</sub> O <sub>6</sub>   | D-(-)-Fructofuranose       | SE_E50,<br>SE_E100   |
| <b>3</b>  | 25.719 | 91                             | 180.16               | C <sub>6</sub> H <sub>12</sub> O <sub>6</sub>   | L-(-)-Sorbose              | SE_E50,<br>SE_E100   |
| <b>4</b>  | 26.89  | 95                             | 180.16               | C <sub>6</sub> H <sub>12</sub> O <sub>6</sub>   | α-D-Glucopyranose          | SE_E50,<br>SE_E100   |
| <b>5</b>  | 27.056 | 90                             | 180.16               | C <sub>6</sub> H <sub>12</sub> O <sub>6</sub>   | D-Glucose                  | SE_E50,<br>SE_E100   |
| <b>6</b>  | 27.862 | 80                             | 164.16               | C <sub>6</sub> H <sub>12</sub> O <sub>5</sub>   | L-Rhamnose                 | SE_E50,<br>SE_E100   |
| <b>7</b>  | 28.308 | 99                             | 170.12               | C <sub>7</sub> H <sub>6</sub> O <sub>5</sub>    | Gallic acid                | SE_E50               |
| <b>8</b>  | 28.685 | 93                             | 180.16               | C <sub>6</sub> H <sub>12</sub> O <sub>6</sub>   | Beta-D-<br>Glucopyranose   | SE_E50,<br>SE_E100   |
| <b>9</b>  | 29.331 | 99                             | 256.42               | C <sub>16</sub> H <sub>32</sub> O <sub>2</sub>  | Palmitic acid              | SE_E50,<br>SE_E100   |
| <b>10</b> | 29.685 | 93                             | 180.16               | C <sub>6</sub> H <sub>12</sub> O <sub>6</sub>   | Myo-Inositol               | SE_E50,<br>SE_E100   |
| <b>11</b> | 30.457 | 99                             | 282.46               | C <sub>18</sub> H <sub>34</sub> O <sub>2</sub>  | 11-Octadecenoic<br>acid    | SE_E50               |
| <b>12</b> | 30.657 | 99                             | 284.48               | C <sub>18</sub> H <sub>36</sub> O <sub>2</sub>  | Stearic acid               | SE_E50               |
| <b>13</b> | 32.817 | 95                             | 342.30               | C <sub>12</sub> H <sub>22</sub> O <sub>11</sub> | D-(+)-Trehalose            | SE_E50,<br>SE_E100   |
| <b>14</b> | 37.601 | 91                             | 342.30               | C <sub>12</sub> H <sub>22</sub> O <sub>11</sub> | Sucrose                    | SE_E50,<br>SE_E100   |
| <b>35</b> | 23.124 | 80                             | 180.16               | C <sub>6</sub> H <sub>12</sub> O <sub>6</sub>   | Beta-D-<br>Galactofuranose | SE_E100              |



**TABLE S3: Bioactive metabolites identified in active UAE extracts**

| No        | RT     | Similar<br>ity<br>Index<br>(%) | Molecula<br>r weight | Molecula<br>r formula                               | Tentative<br>metabolites | Relative<br>extracts |
|-----------|--------|--------------------------------|----------------------|-----------------------------------------------------|--------------------------|----------------------|
| <b>1</b>  | 20.032 | 90                             | 180.16               | C <sub>6</sub> H <sub>12</sub> O <sub>6</sub>       | D-Psicofuranose          | E60, E80,<br>E100    |
| <b>2</b>  | 20.638 | 87                             | 180.16               | C <sub>6</sub> H <sub>12</sub> O <sub>6</sub>       | D-(-)-<br>Fructofuranose | E60, E80,<br>E100    |
| <b>15</b> | 21.175 | 91                             | 192.17               | C <sub>6</sub> H <sub>8</sub> O <sub>7</sub>        | Citric acid              | E60, E80             |
| <b>19</b> | 23.215 | 81                             | 180.16               | C <sub>6</sub> H <sub>12</sub> O <sub>6</sub>       | D-Psicopyranose          | E80                  |
| <b>16</b> | 23.387 | 94                             | 180.16               | C <sub>6</sub> H <sub>12</sub> O <sub>6</sub>       | D-(+)-Talofuranose       | E60, E80             |
| <b>17</b> | 25.719 | 91                             | 180.16               | C <sub>6</sub> H <sub>12</sub> O <sub>6</sub>       | D-(-)-Fructose           | E60, E80,<br>E100    |
| <b>20</b> | 25.742 | 91                             | 150.13               | C <sub>5</sub> H <sub>10</sub> O <sub>5</sub>       | D-(+)-Xylose             | E80                  |
| <b>18</b> | 26.53  | 91                             | 195.17               | C <sub>6</sub> H <sub>13</sub> N<br>O <sub>6</sub>  | Fructose oxime           | E60, E100            |
| <b>4</b>  | 26.89  | 95                             | 180.16               | C <sub>6</sub> H <sub>12</sub> O <sub>6</sub>       | α-D-<br>Glucopyranose    | E80                  |
| <b>5</b>  | 27.056 | 90                             | 180.16               | C <sub>6</sub> H <sub>12</sub> O <sub>6</sub>       | D-Glucose                | E60, E80,<br>E100    |
| <b>8</b>  | 28.685 | 93                             | 180.16               | C <sub>6</sub> H <sub>12</sub> O <sub>6</sub>       | Beta-D-<br>Glucopyranose | E60, E80,<br>E100    |
| <b>9</b>  | 29.331 | 99                             | 256.42               | C <sub>16</sub> H <sub>32</sub> O <sub>2</sub>      | Palmitic acid            | E60, E80,<br>E100    |
| <b>10</b> | 29.685 | 93                             | 180.16               | C <sub>6</sub> H <sub>12</sub> O <sub>6</sub>       | Myo-Inositol             | E60, E80,<br>E100    |
| <b>12</b> | 30.657 | 99                             | 284.48               | C <sub>18</sub> H <sub>36</sub> O <sub>2</sub>      | Stearic acid             | E60, E100            |
| <b>13</b> | 32.817 | 95                             | 342.30               | C <sub>12</sub> H <sub>22</sub> O <sub>1</sub><br>1 | D-(+)-Trehalose          | E60, E80,<br>E100    |
| <b>21</b> | 37.195 | 99                             | 414.71               | C <sub>29</sub> H <sub>50</sub> O                   | Beta-Sitosterol          | E100                 |
| <b>14</b> | 37.601 | 91                             | 342.30               | C <sub>12</sub> H <sub>22</sub> O <sub>1</sub><br>1 | Sucrose                  | E60, E80,<br>E100    |

**TABLE S4: Bioactive metabolites identified in all SFE extracts**

| No        | RT     | Similarity Index (%) | Molecular weight | Molecular formula                              | Tentative metabolites     | Relative extracts |
|-----------|--------|----------------------|------------------|------------------------------------------------|---------------------------|-------------------|
| <b>15</b> | 21.175 | 91                   | 192.12           | C <sub>6</sub> H <sub>8</sub> O <sub>7</sub>   | Citric acid               | SFE_2,<br>SFE_3   |
| <b>3</b>  | 25.719 | 91                   | 180.16           | C <sub>6</sub> H <sub>12</sub> O <sub>6</sub>  | L-(-)-Sorbose             | SFE_2,<br>SFE_3   |
| <b>4</b>  | 26.89  | 95                   | 180.16           | C <sub>6</sub> H <sub>12</sub> O <sub>6</sub>  | $\alpha$ -D-Glucopyranose | SFE_2,<br>SFE_3   |
| <b>5</b>  | 27.056 | 90                   | 180.16           | C <sub>6</sub> H <sub>12</sub> O <sub>6</sub>  | D-Glucose                 | SFE_2,<br>SFE_3   |
| <b>22</b> | 27.525 | 91                   | 180.16           | C <sub>6</sub> H <sub>12</sub> O <sub>6</sub>  | D-Galactose               | SFE_2,<br>SFE_3   |
| <b>23</b> | 27.925 | 98                   | 164.16           | C <sub>9</sub> H <sub>8</sub> O <sub>3</sub>   | 4-Coumaric acid           | SFE_2,<br>SFE_3   |
| <b>7</b>  | 28.308 | 99                   | 170.12           | C <sub>7</sub> H <sub>6</sub> O <sub>5</sub>   | Gallic acid               | SFE_2,<br>SFE_3   |
| <b>9</b>  | 29.331 | 99                   | 256.42           | C <sub>16</sub> H <sub>32</sub> O <sub>2</sub> | Palmitic acid             | SFE_2,<br>SFE_3   |
| <b>10</b> | 29.685 | 93                   | 180.16           | C <sub>6</sub> H <sub>12</sub> O <sub>6</sub>  | Myo-Inositol              | SFE_2,<br>SFE_3   |
| <b>24</b> | 30.017 | 99                   | 180.16           | C <sub>9</sub> H <sub>8</sub> O <sub>4</sub>   | Caffeic acid              | SFE_2,<br>SFE_3   |
| <b>11</b> | 30.457 | 99                   | 282.46           | C <sub>18</sub> H <sub>34</sub> O <sub>2</sub> | 11-Octadecenoic acid      | SFE_2             |
| <b>25</b> | 30.474 | 95                   | 280.45           | C <sub>18</sub> H <sub>32</sub> O <sub>2</sub> | Linoleic acid             | SFE_2,<br>SFE_3   |
| <b>26</b> | 30.508 | 99                   | 282.46           | C <sub>18</sub> H <sub>34</sub> O <sub>2</sub> | Oleic acid                | SFE_2,<br>SFE_3   |
| <b>12</b> | 30.657 | 99                   | 284.48           | C <sub>18</sub> H <sub>36</sub> O <sub>2</sub> | Stearic acid              | SFE_2,<br>SFE_3   |
| <b>27</b> | 30.731 | 70                   | 282.46           | C <sub>18</sub> H <sub>34</sub> O <sub>2</sub> | 9-Octadecenoic acid       | SFE_2             |
| <b>28</b> | 31.36  | 99                   | 338.65           | C <sub>24</sub> H <sub>50</sub>                | Tetracosane               | SFE_2,<br>SFE_3   |
| <b>29</b> | 31.703 | 83                   | 180.16           | C <sub>6</sub> H <sub>12</sub> O <sub>6</sub>  | D-Lactose                 | SFE_2             |

|           |        |    |        |                                                 |                         |                           |
|-----------|--------|----|--------|-------------------------------------------------|-------------------------|---------------------------|
| <b>13</b> | 32.817 | 95 | 342.30 | C <sub>12</sub> H <sub>22</sub> O <sub>11</sub> | D-(+)-Trehalose         | SFE_2,<br>SFE_3           |
| <b>30</b> | 33.023 | 95 | 240.47 | C <sub>17</sub> H <sub>36</sub>                 | Heptadecane             | SFE_2,<br>SFE_3           |
| <b>31</b> | 34.103 | 99 | 394.76 | C <sub>28</sub> H <sub>58</sub>                 | Octacosane              | SFE_2,<br>SFE_3           |
| <b>32</b> | 35.418 | 99 | 386.65 | C <sub>27</sub> H <sub>46</sub> O               | Cholesterol             | SFE_1,<br>SFE_2,<br>SFE_3 |
| <b>33</b> | 36.38  | 99 | 400.68 | C <sub>28</sub> H <sub>48</sub> O               | Campesterol             | SFE_1,<br>SFE_2,<br>SFE_3 |
| <b>34</b> | 36.561 | 94 | 412.69 | C <sub>29</sub> H <sub>48</sub> O               | Stigmasterol            | SFE_1,<br>SFE_2,<br>SFE_3 |
| <b>21</b> | 37.195 | 99 | 414.71 | C <sub>29</sub> H <sub>50</sub> O               | Beta-Sitosterol         | SFE_1,<br>SFE_2,<br>SFE_3 |
| <b>14</b> | 37.601 | 91 | 342.30 | C <sub>12</sub> H <sub>22</sub> O <sub>11</sub> | Sucrose                 | SFE_2,<br>SFE_3           |
| <b>36</b> | 32.143 | 93 | 240.48 | C <sub>17</sub> H <sub>36</sub>                 | Heptadecane             | SFE_1                     |
| <b>37</b> | 32.56  | 93 | 308.59 | C <sub>22</sub> H <sub>44</sub>                 | 1-Docosene              | SFE_1                     |
| <b>38</b> | 33.00  | 93 | 282.56 | C <sub>20</sub> H <sub>42</sub>                 | Eicosane                | SFE_1                     |
| <b>39</b> | 31.908 | 98 | 390.56 | C <sub>24</sub> H <sub>38</sub> O <sub>4</sub>  | Di-N-Octyl<br>phthalate | SFE_1                     |

**TABLE S5: The composition of identified metabolites of all extracts**

| Percentage of bioactive metabolites present in all extracts (%) |           |            |            |
|-----------------------------------------------------------------|-----------|------------|------------|
| Type of compounds                                               | <b>SE</b> | <b>UAE</b> | <b>SFE</b> |
| Carbohydrates                                                   | 73        | 76         | 28         |
| Fatty acids                                                     | 20        | 12         | 21         |
| Phenolic acids                                                  | 7         | -          | 7          |
| Organic acids                                                   | -         | 6          | 10         |
| Sterols                                                         | -         | 6          | 14         |
| Alkane                                                          | -         | -          | 21         |

**TABLE S6: Reported bioactive metabolites with  $\alpha$ -glucosidase inhibitory activity**

| No | Compound            | IC <sub>50</sub> (μg/ml)              | Plant                                                                     | Reference               |
|----|---------------------|---------------------------------------|---------------------------------------------------------------------------|-------------------------|
| 1  | Citric acid         | 20 (100% inhibition)                  | <i>Rosa laevigata</i>                                                     | Ye et al. 2010          |
| 2  | Palmitic acid       | > 400                                 | <i>Weston wheat</i>                                                       | Liu et al. 2011         |
|    |                     | 8.9 ± 2.1 (per 10 μg/ml)              | <i>germ</i>                                                               | Artanti et al. 2012     |
|    |                     | 21.3                                  | <i>Taxus</i>                                                              | Miyazawa et al.         |
|    |                     |                                       | <i>sumatrana</i><br><i>Arctium</i><br><i>lappa L.</i>                     | 2005                    |
| 3  | Stearic acid        | 5.3 ± 1.6 (per 10 μg/ml)              | <i>Taxus</i>                                                              | Artanti et al. 2012     |
|    |                     | 22.2                                  | <i>sumatrana</i><br><i>Arctium</i><br><i>lappa L.</i>                     | Miyazawa et al.<br>2005 |
| 4  | Linoleic acid       | > 200                                 | <i>Weston wheat</i>                                                       | Liu et al. 2011         |
|    |                     | 17.9                                  | <i>germ</i>                                                               | Miyazawa et al.         |
|    |                     |                                       | <i>Arctium</i><br><i>lappa L.</i>                                         | 2005                    |
| 5  | Oleic Acid          | > 400                                 | <i>Weston wheat</i>                                                       | Liu et al. 2011         |
|    |                     | 97.4 ± 5.3 (per 10 μg/ml)             | <i>germ</i>                                                               | Artanti et al. 2012     |
|    |                     | 3.43                                  | <i>Taxus</i>                                                              | Nguyen & Kim            |
|    |                     | 64.2                                  | <i>sumatrana</i>                                                          | 2015                    |
|    |                     |                                       | <i>Stichopus</i><br><i>japonicas</i><br><i>Arctium</i><br><i>lappa L.</i> | Miyazawa et al.<br>2005 |
| 6  | 9-Octadecenoic acid | 4.2                                   | <i>Stichopus japonicas</i>                                                | Nguyen & Kim<br>2015    |
| 7  | Gallic acid         | 0.88                                  | <i>Terminalia superba</i>                                                 | Wansi et al. 2007       |
| 8  | Stigmasterol        | 34.2 ± 3.7 (% inhibition) at 50 μg/ml | <i>Dillenia indica</i>                                                    | Kumar et al. 2013       |
| 9  | Beta-Sitosterol     | 52.5 ± 2.4 (% inhibition) at 50 μg/ml | <i>Dillenia indica</i>                                                    | Kumar et al. 2013       |

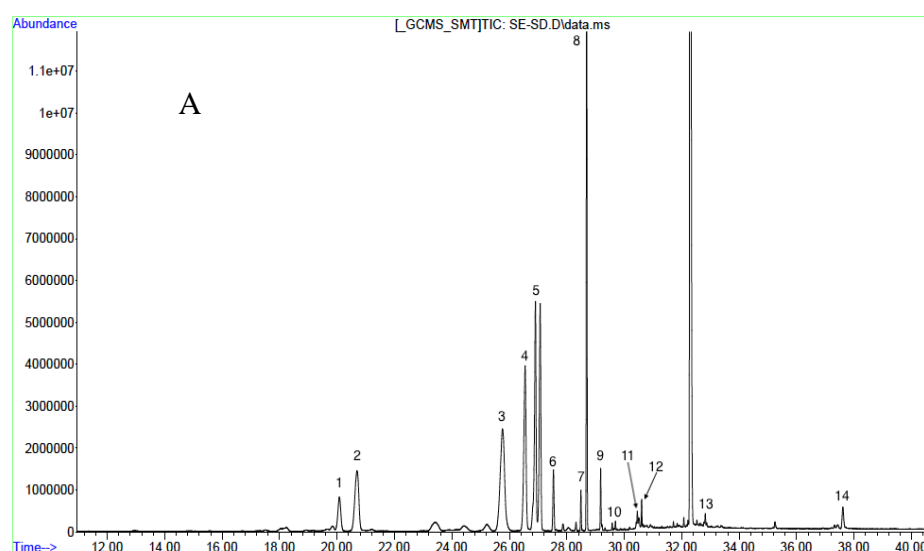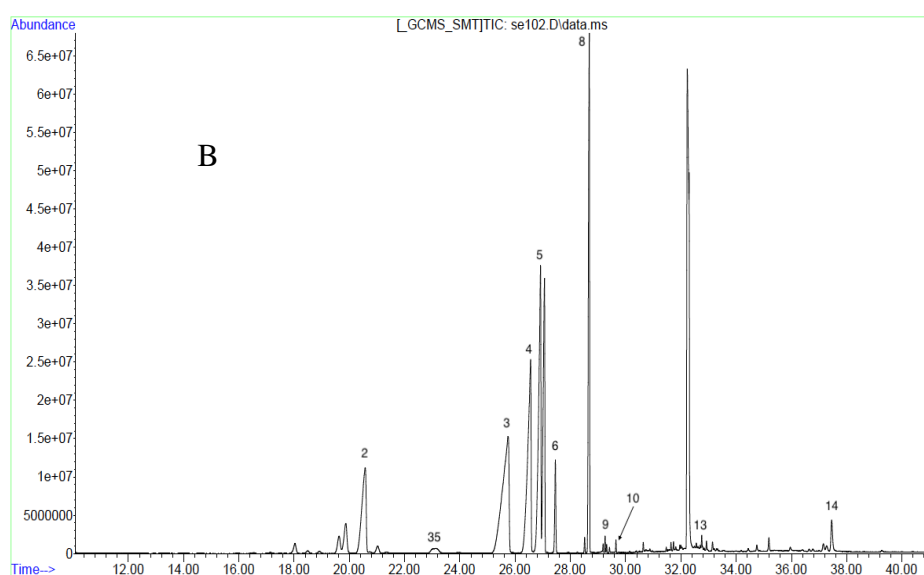

**FIGURE S1(a):** GC-MS chromatogram (TIC) of metabolites in SE\_E50 (A) and SE\_E100 (B) extracts from flesh of *S. zalacca*

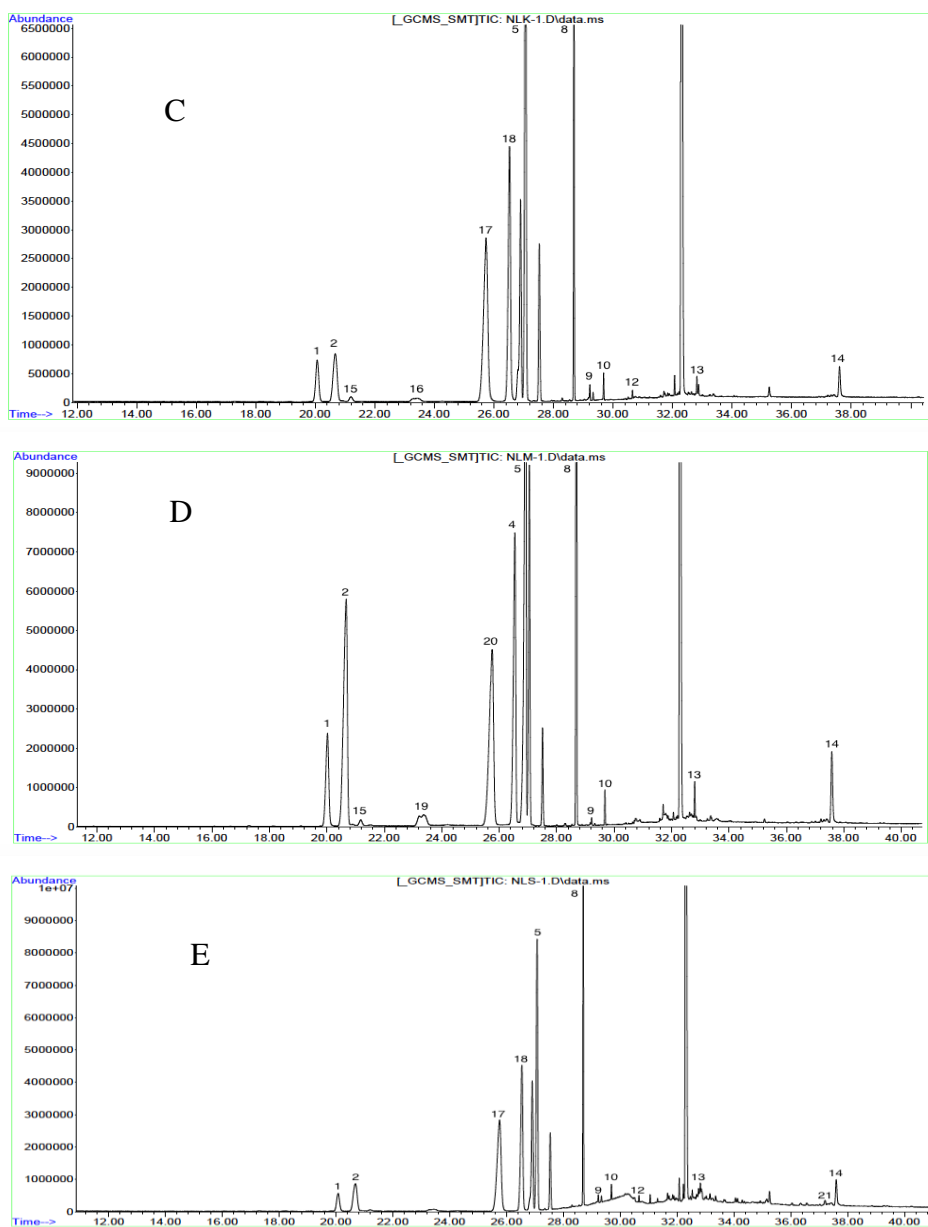

**FIGURE S1(b):** GC-MS chromatogram (TIC) of metabolites in UAE\_E60 (C), UAE\_E80 (D) and UAE\_E100 (E) extracts from *S. zalacca*

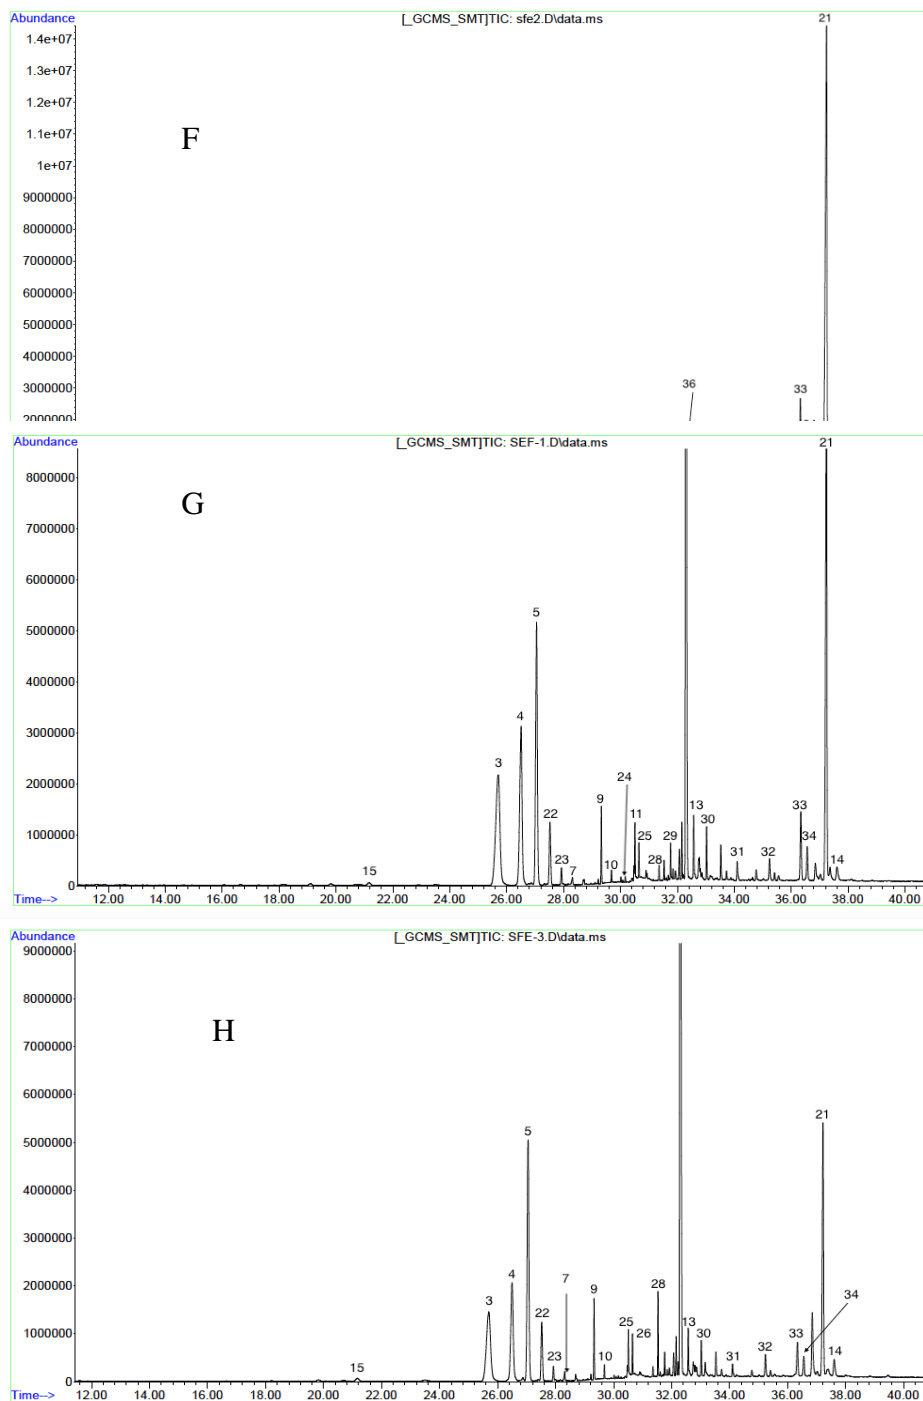

**FIGURE S1(c):** GC-MS chromatogram (TIC) of metabolites in SFE\_1 (F), SFE\_2 (G) and SFE\_3 (H) extracts from *S. zalacca*.
